# Supplementary material for: Bromodomain and extra-terminal domain inhibition modulates the expression of pathologically relevant microRNAs in diffuse large B-cell lymphoma
Source: PubMed Central journal article supplement — Haematologica. 2018 Aug 3;103(12):2049–58. doi: 10.3324/haematol.2018.191684 (PMC6269312; doi:10.3324/haematol.2018.191684), 2018-12
Supplement: 2018_191684-Disclosures_and_Contributions.pdf [file 2018_191684-Disclosures_and_Contributions.pdf]

Haematologica  
HAEMATOL/2018/191684  
Version 4

Bromodomain and extra-terminal domain inhibition modulates the expression of pathologically relevant microRNAs in diffuse large B-cell lymphoma

Afua A. Mensah, Luciano Cascione, Eugenio Gaudio, Chiara Tarantelli, Riccardo Bomben, Elena Bernasconi, Domenico Zito, Andrea Lampis, Jens C. Hahne, Andrea Rinaldi, Anastasios Stathis, Emanuele Zucca, Ivo Kwee, Valter Gattei, Nicola Valeri, Maria E. Riveiro, and Francesco Bertoni

Disclosures: Maria E. Riveiro was an employee of Oncology Therapeutic Development. Francesco Bertoni has received institutional research funds from Oncology Therapeutic Development. No potential conflicts of interest were disclosed by the other authors.

Contributions: Contribution: AAM, EG, CT, EB, performed the experiments. RB, DZ, AL, JCH, AR performed expression profiling analysis under the guidance of VG, NV and FB. FB supervised the overall project. AAM, LC, FB designed experiments, analyzed and interpreted the data, and wrote the paper. All authors reviewed and edited the paper.
